# Supplementary material for: Agonistic CD40 therapy induces tertiary lymphoid structures but impairs responses to checkpoint blockade in glioma
Source: PubMed Central journal article supplement (PMC8257767; doi:10.1038/s41467-021-24347-7), 2021-07-05
Supplement: 41467_2021_24347_MOESM1_ESM.pdf [file 41467_2021_24347_MOESM1_ESM.pdf]

**Agonistic CD40 therapy induces tertiary lymphoid structures but impairs  
responses to checkpoint blockade in glioma**

*Supplementary information*

**Supplementary Table 1.** Histological characteristics and WHO classification of the human glioma samples included in the cohort. All samples were de-novo gliomas collected from treatment-naïve patients. The table also reports TLS presence and classification for each patient. Abbreviations: mut (mutation); co-del (co-deletion); NA (not assessed).

| Patient ID      | IDH1 mut | 1p/19q co-del | ATR X mut | p53 mut | Histological diagnosis (WHO) | Grade | Type of section | TLS presence | Immature TLS | Organized TLS |
|-----------------|----------|---------------|-----------|---------|------------------------------|-------|-----------------|--------------|--------------|---------------|
| 1               | -        | -             | -         | -       | Astrocytoma                  | II    | En block, large | -            | 0            | 0             |
| 2               | +        | -             | +         | -       | Astrocytoma                  | II    | En block, large | -            | 0            | 0             |
| 3               | +        | -             | +         | -       | Astrocytoma                  | II    | En block, large | -            | 0            | 0             |
| 4               | +        | +             | -         | -       | Oligodendroglioma            | II    | En block, large | -            | 0            | 0             |
| 5               | +        | +             | -         | -       | Oligodendroglioma            | II    | En block, large | +            | 0            | 3             |
| 6               | +        | +             | -         | -       | Oligodendroglioma            | II    | En block, large | +            | 3            | 0             |
| 7               | -        | -             | -         | -       | Anaplastic astrocytoma       | III   | En block, large | -            | 0            | 0             |
| 8               | +        | +             | -         | -       | Anaplastic oligodendroglioma | III   | En block, large | +            | 6            | 1             |
| 9               | +        | +             | -         | -       | Anaplastic oligodendroglioma | III   | En block, large | -            | 0            | 0             |
| 10              | +        | +             | -         | -       | Anaplastic oligodendroglioma | III   | En block, large | -            | 0            | 0             |
| 11 <sup>#</sup> | -        | -             | -         | -       | Glioblastoma                 | IV    | En block, large | +            | 6            | 0             |
| 12              | -        | -             | NA        | -       | Glioblastoma                 | IV    | Large biopsy    | -            | 0            | 0             |
| 13              | -        | -             | NA        | +       | Glioblastoma                 | IV    | Large biopsy    | +            | 1            | 4             |
| 14              | -        | -             | NA        | -       | Glioblastoma                 | IV    | Large biopsy    | -            | 0            | 0             |
| 15              | -        | -             | NA        | +       | Glioblastoma                 | IV    | Large biopsy    | -            | 0            | 0             |
| 16              | -        | -             | NA        | +       | Glioblastoma                 | IV    | Large biopsy    | +            | 1            | 3             |
| 17              | -        | -             | NA        | +       | Glioblastoma                 | IV    | Large biopsy    | -            | 0            | 0             |
| 18              | -        | -             | NA        | +       | Glioblastoma                 | IV    | Large biopsy    | -            | 0            | 0             |
| 19              | -        | -             | NA        | +       | Glioblastoma                 | IV    | Large biopsy    | -            | 0            | 0             |
| 20              | -        | -             | NA        | +       | Glioblastoma                 | IV    | Large biopsy    | -            | 0            | 0             |
| 21              | -        | -             | NA        | -       | Glioblastoma                 | IV    | Large biopsy    | +            | 1            | 0             |
| 22              | -        | -             | NA        | -       | Glioblastoma                 | IV    | Large biopsy    | +            | 1            | 0             |
| 23              | -        | -             | NA        | -       | Glioblastoma                 | IV    | Large biopsy    | +            | 0            | 1             |
| 24              | -        | -             | NA        | -       | Glioblastoma                 | IV    | Large biopsy    | +            | 2            | 0             |
| 25 <sup>*</sup> | -        | -             | -         | -       | Glioblastoma                 | IV    | Large biopsy    | +            | 0            | 4             |
| 26              | -        | -             | -         | -       | Glioblastoma                 | IV    | Large biopsy    | -            | 0            | 0             |

<sup>#</sup>Patient 11: this patient was also afflicted with chronic lymphocytic leukemia

<sup>\*</sup>Patient 25: samples collected from a primary and a secondary surgery were available. TLS were found in both cases.

**Supplementary Table 2.** Mouse primer sequences used for real-time quantitative PCR.

| Target         | Primer sequence (5' - 3') |                          |
|----------------|---------------------------|--------------------------|
| <i>Cxcl13</i>  | Fw                        | CATAGATCGGATTCAAGTTACGCC |
|                | Rs                        | TCTTGGTCCAGATCACAACCTCA  |
| <i>Ccl19</i>   | Fw                        | ACCACACTAAGGGGCTATCAG    |
|                | Rs                        | TTCTTCAGTCTTCGGATGATGC   |
| <i>Ccl21</i>   | Fw                        | GCTGCAAGAGAACTGAACAGACA  |
|                | Rs                        | CGTGAACCACCCAGCTTGA      |
| <i>Ccl22</i>   | Fw                        | AGGTCCCTATGGTGCCAATGT    |
|                | Rs                        | CGGCAGGATTTTGAGGTCCA     |
| <i>Il10</i>    | Fw                        | GCTCTTACTGACTGGCATGAG    |
|                | Rs                        | CGCAGCTCTAGGAGCATGTG     |
| <i>Lgals1</i>  | Fw                        | CAAGCTGCCAGACGGACAT      |
|                | Rs                        | AGGCCACGCACTTAATCTTGA    |
| <i>Lta</i>     | Fw                        | GCATCTTCTAAGCCCTGGGGG    |
|                | Rs                        | TGTCATGTGGAGGACCTGCTGTG  |
| <i>Ltb</i>     | Fw                        | GTTCAACAGCTGCCAAAGGG     |
|                | Rs                        | CATCCAAGCGCCTATGAGGT     |
| <i>Tgfβ</i>    | Fw                        | CTCCCGTGGCTTCTAGTGC      |
|                | Rs                        | GCCTTAGTTTGGACAGGATCTG   |
| <i>Tnfsf14</i> | Fw                        | AGCAGCACATCTTACAGGAGC    |
|                | Rs                        | AGCTGCACTTTGGAGTACACA    |

**Supplementary Table 3.** List of antibodies used for immunostaining of mouse vibratome sections, cryosections and tissue for laser microdissection (LMD).

|                                                         | Marker                           | Clone      | Fluorochrome | Dilution | Company           | Identifier<br>(Cat # and RRID)   |
|---------------------------------------------------------|----------------------------------|------------|--------------|----------|-------------------|----------------------------------|
| <b>Used for<br/>LMD</b>                                 | B220                             | RA3-6B2    | PE           | 1 : 100  | Biolegend         | # 103207<br>RRID:AB_312992       |
|                                                         | CD45                             | 30-F11     | AF488        | 1 : 100  | Biolegend         | # 103122<br>RRID:AB_493531       |
| <b>Used for<br/>cryo- or<br/>vibratome<br/>sections</b> | Anti-rat                         | polyclonal | AF488        | 1 : 500  | Life Technologies | # A-21208<br>RRID:AB_2535794     |
|                                                         | CD11b                            | M1/70      | APC          | 1 : 100  | Biolegend         | # 101211<br>RRID:AB_312794       |
|                                                         | CD11c                            | N418       | -            | 1 : 100  | Abcam             | # ab33483<br>RRID:AB_726084      |
|                                                         | CD19                             | polyclonal | -            | 1 : 100  | Abcam             | # ab227019<br>RRID:n/a           |
|                                                         | CD21                             | SC0681     | -            | 1 : 100  | Thermo Fisher     | # MA5-32227<br>RRID:AB_2809513   |
|                                                         | CD23                             | PA5-79242  | -            | 1 : 100  | Thermo Fisher     | # PA5-79242<br>RRID:AB_2746358   |
|                                                         | CD3                              | 17A2       | BV421        | 1 : 100  | BD                | # 564008<br>RRID:AB_2732058      |
|                                                         | CD31                             | 2H8        | -            | 1 : 100  | Thermo Fisher     | # MA3105<br>RRID:AB_223592       |
|                                                         | CD35                             | 8C12       | DyLight 350  | 1 : 50   | Novus Biologicals | # NBP2-52668UV<br>RRID:n/a       |
|                                                         | CD45                             | 30-F11     | APC          | 1 : 100  | Biolegend         | # 103112<br>RRID:AB_312977       |
|                                                         | CD62L                            | MEL-14     | AF647        | 1 : 100  | Biolegend         | # 104421<br>RRID:AB_493379       |
|                                                         | ColIV                            | polyclonal | -            | 1 : 100  | Abcam             | # ab6586<br>RRID:AB_305584       |
|                                                         | FN                               | polyclonal | -            | 1 : 100  | Abcam             | # ab2413<br>RRID:AB_2262874      |
|                                                         | FoxP3                            | 150D       | AF647        | 1 : 100  | Biolegend         | #320013<br>RRID:AB_439749        |
|                                                         | F4/80                            | BM8        | PeCy5        | 1 : 100  | Biolegend         | # 123111<br>RRID:AB_893494       |
|                                                         | IgG- F'2<br>fragment<br>specific | polyclonal | AF647        | 1 : 100  | JIR               | # 115-606-006<br>RRID:AB_2338922 |
|                                                         | Ki67                             | SP6        | -            | 1 : 100  | Abcam             | # ab16667<br>RRID:AB_302459      |

**Supplementary Table 4.** List of antibodies and dyes used to characterize T cells and antigen presenting cells (APCs) in the tumor microenvironment (TME) by flow cytometry.

|                                                    | Marker          | Clone                     | Fluorochrome | Dilution | Company     | Identifier (Cat # and RRID)   |
|----------------------------------------------------|-----------------|---------------------------|--------------|----------|-------------|-------------------------------|
| <b>17-color panel used to characterize T cells</b> | CD45            | 30-F11                    | BV510        | 1 : 100  | BD          | # 563891, RRID:AB_2734134     |
|                                                    | CD3e            | 145-2C11                  | BV421        | 1 : 100  | BD          | # 562600, RRID:AB_11153670    |
|                                                    | CD8             | 53-6.7                    | APC-Cy7      | 1 : 100  | BD          | # 557654, RRID:AB_396769      |
|                                                    | CD4             | GK1.5                     | BUV496       | 1 : 100  | BD          | # 612952, RRID:AB_2813886     |
|                                                    | CD44            | IM7                       | FITC         | 1 : 100  | Biologend   | # 103022, RRID:AB_493685      |
|                                                    | CD62L           | MEL-14                    | PE-Cy7       | 1 : 100  | BD          | # 565535, RRID:AB_2739286     |
|                                                    | CD69            | H1.2F3                    | BB700        | 1 : 100  | BD          | # 566500, RRID:AB_2744450     |
|                                                    | CD127           | A7R34                     | PE-Cy5       | 1 : 100  | Biologend   | # 135016, RRID:AB_1937261     |
|                                                    | PD-1            | 29F.1A12                  | BV785        | 1 : 100  | Biologend   | # 135225, RRID:AB_2563680     |
|                                                    | TIM-3           | RMT3-23                   | BV605        | 1 : 100  | Biologend   | # 119721, RRID:AB_2616907     |
|                                                    | LAG-3           | C9B7W                     | BV711        | 1 : 100  | BD          | # 563179, RRID:AB_2737398     |
|                                                    | Ki67            | 16A8                      | PE dazzle594 | 1 : 100  | Biologend   | # 652428, RRID:AB_2632696     |
|                                                    | CXCR5           | L138D7                    | BV650        | 1 : 100  | Biologend   | # 145517, RRID:AB_2562453     |
|                                                    | KLRG1           | 2F1                       | BUV737       | 1 : 100  | BD          | # 741812, RRID:AB_2871150     |
|                                                    | Foxp3           | 150D                      | AF647        | 1 : 100  | Biologend   | #320013, RRID:AB_439749       |
|                                                    | CD25            | 3C7                       | PE           | 1 : 100  | Biologend   | # 101904, RRID:AB_312847      |
| LiveDead                                           | -               | Fixable viability dye 700 | 1 : 2500     | BD       | # 564997    |                               |
| <b>17-color panel used to characterize APCs</b>    | CD45            | 30-F11                    | BV510        | 1 : 100  | BD          | # 563891, RRID:AB_2734134     |
|                                                    | IL10            | JES5-16E3                 | PE dazzle594 | 1 : 50   | Biologend   | # 505034, RRID:AB_2566329     |
|                                                    | CD19            | 6D5                       | APC-Cy7      | 1 : 50   | Biologend   | # 115512, RRID:AB_313647      |
|                                                    | IA/IE           | M5/114.15.2               | BB700        | 1 : 200  | BD          | # 746197, RRID:AB_2743544     |
|                                                    | CD11b           | M1/70                     | BUV395       | 1 : 100  | BD          | # 565976, RRID:AB_2721166     |
|                                                    | Ly6G            | 1A8                       | BV421        | 1 : 100  | BD          | # 562737, RRID:AB_2737756     |
|                                                    | CD11c           | N418                      | PE-Cy5       | 1 : 100  | Biologend   | # 117316, RRID:AB_493566      |
|                                                    | CX3CR1          | SA011F11                  | BV650        | 1 : 200  | Biologend   | # 149033, RRID:AB_2565999     |
|                                                    | Ly-6C           | HK1.4                     | BV785        | 1 : 200  | Biologend   | # 128041, RRID:AB_2565852     |
|                                                    | CD103           | M290                      | BV711        | 1 : 50   | BD          | 743791, RRID:AB_2741759       |
|                                                    | F4/80           | 6F12                      | BV605        | 1 : 100  | BD          | # 744337, RRID:AB_2742164     |
|                                                    | PD-L1           | 10F.9G2                   | PE           | 1 : 100  | Biologend   | 124308, RRID:AB_2073556       |
|                                                    | IL-12 (p40/p70) | C15.6                     | APC          | 1 : 50   | BD          | # 554480, RRID:AB_398560      |
|                                                    | iNOS            | CXNFT                     | A488         | 1 : 100  | eBioscience | # 53-5920-82, RRID:AB_2574423 |
|                                                    | Arginase I      | A1exF5                    | PE-Cy7       | 1 : 100  | eBioscience | # 25-3697-80, RRID:AB_2734840 |
|                                                    | CD86            | GL-1                      | BUV737       | 1 : 100  | BD          | # 741737, RRID:AB_2871107     |
| LiveDead                                           | -               | Fixable viability dye 700 | 1 : 2500     | BD       | # 564997    |                               |

**Supplementary Table 5.** List of additional antibodies and dyes used for flow cytometry or FACS.

|                                                                             | <b>Marker</b> | <b>Clone</b> | <b>Fluorochrome</b> | <b>Dilution</b> | <b>Company</b>   | <b>Identifier<br/>(Cat # and RRID)</b> |
|-----------------------------------------------------------------------------|---------------|--------------|---------------------|-----------------|------------------|----------------------------------------|
| <b>Other<br/>antibodies<br/>used for<br/>flow<br/>cytometry<br/>or FACS</b> | CD45          | 30-F11       | FITC                | 1 : 100         | Biolegend        | # 103107,<br>RRID:AB_312972            |
|                                                                             | B220          | RA3-6B2      | AF488               | 1 : 100         | Biolegend        | # 103225,<br>RRID:AB_389308            |
|                                                                             | B220          | RA3-6B2      | PE                  | 1 : 100         | Biolegend        | # 103208,<br>RRID:AB_312993            |
|                                                                             | B220          | RA3-6B2      | APCCy7              | 1 : 100         | Biolegend        | # 103223,<br>RRID:AB_313006            |
|                                                                             | CD1d          | 1B1          | BV421               | 1 : 100         | BD               | # 562712,<br>RRID:AB_2737739           |
|                                                                             | CD19          | 6D5          | APC                 | 1 : 100         | Biolegend        | # 115512,<br>RRID:AB_313647            |
|                                                                             | CD19          | 1D3          | PerCP-Cy5.5         | 1 : 100         | BD               | # 561113,<br>RRID:AB_10563071          |
|                                                                             | CD4           | GK1.5        | PerCP               | 1 : 100         | Biolegend        | # 100432,<br>RRID:AB_893323            |
|                                                                             | CD4           | RM4-5        | AF488               | 1 : 100         | Biolegend        | # 100529,<br>RRID:AB_389303            |
|                                                                             | CD5           | 53-7.3       | PE-Cy5              | 1 : 100         | Biolegend        | # 100610,<br>RRID:AB_312739            |
|                                                                             | CD107a        | 1D4B         | PECy7               | 1 : 100         | Biolegend        | # 121620,<br>RRID:AB_2562147           |
|                                                                             | CD69          | H1.2F3       | PE                  | 1 : 100         | BD               | # 561932,<br>RRID:AB_10897992          |
|                                                                             | CD69          | H1.2F3       | APC                 | 1 : 100         | Biolegend        | # 104514,<br>RRID:AB_492843            |
|                                                                             | CD11b         | M1/70        | APC                 | 1 : 100         | Biolegend        | # 101212,<br>RRID:AB_312795            |
|                                                                             | CD19          | 6D5          | FITC                | 1 : 100         | Biolegend        | # 115506,<br>RRID:AB_313641            |
|                                                                             | CD3           | 145-2C11     | PerCP-Cy5.5         | 1 : 100         | Thermo<br>Fisher | # 45-0031-80,<br>RRID:AB_906226        |
|                                                                             | CD8           | 53-6.7       | APC-Cy7             | 1 : 100         | BD               | # 557654,<br>RRID:AB_396769            |
|                                                                             | IFN $\gamma$  | XMG1.2       | PE                  | 1 : 50          | BD               | # 562303,<br>RRID:AB_11153140          |
|                                                                             | LiveDead      | -            | Zombie Aqua         | 1 : 1000        | Biolegend        | # 423102                               |

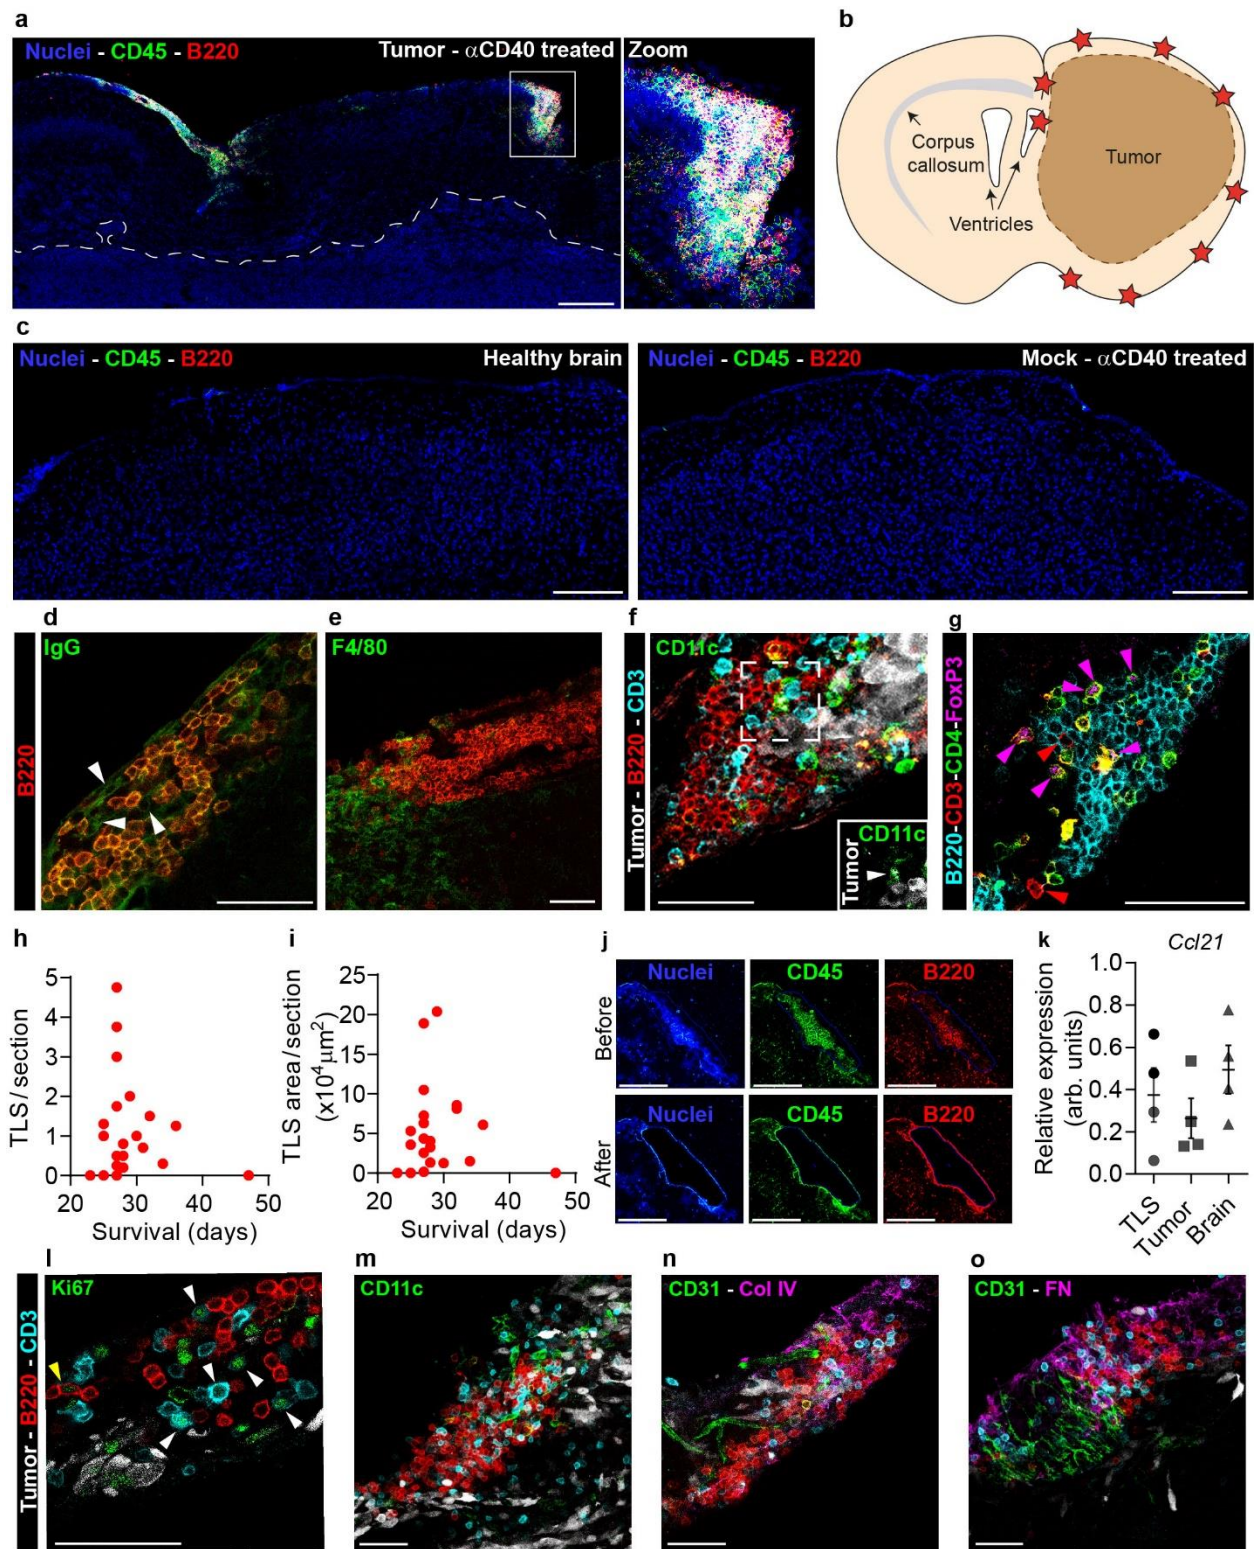

**Supplementary Fig. 1: Induction of tertiary lymphoid structures (TLS) in murine glioma models.**

(a) Immunofluorescent staining of dense CD45<sup>+</sup>B220<sup>+</sup> TLS adjacent to the meninges and in close proximity to the tumor tissue (dense nuclei, bottom) in GL261 tumor-bearing mice. The image is representative of 5 independent

animal experiments. Scale bar: 200  $\mu\text{m}$ . **(b)** Schematic representation of TLS location in murine glioma models. TLS typically formed in the tumor-bearing hemisphere and were observed in multiple locations in close contact with the pia mater around the cortex or in the choroid plexuses. **(c)**  $\text{CD45}^+\text{B220}^+$  TLS were not present in the brain of non-treated healthy mice or mice which had undergone mock tumor implantation followed by treatment with  $\alpha\text{CD40}$  antibodies. The images is representative of 3 mice. Scale bars: 200  $\mu\text{m}$ . **(d-g)** Immunostaining of TLS in the brain of  $\alpha\text{CD40}$ -treated GL261 tumor-bearing mice revealed the presence of **(d)**  $\text{B220}^+\text{IgG}^+$  B cells and rare  $\text{B220}^{\text{low/-}}\text{IgG}^+$  plasma cells (indicated by white arrows), **(e)**  $\text{F4/80}^+$  macrophages, **(f)** rare  $\text{GFP}^+\text{CD11c}^+$  dendritic cells, **(g)**  $\text{Foxp3}^+$  T regs. The images are representative of 3 independent experiments. For clarity, the same area within the dotted square in (f) is shown on the bottom right of the panel in the absence of B220 and CD3 channels. The arrow indicates a  $\text{CD11c}^+$  dendritic cell positive for GFP (or “tumor”, white). The magenta arrows in (g) indicate cells that stained triple-positive for CD3, CD4 and FoxP3. Red arrows indicate cells that stained positive for CD3 only. Scale bars: 50 $\mu\text{m}$ . **(h-i)** Quantification of **(h)** the number of TLS per section and **(i)** TLS surface area plotted against the time of sacrifice for  $\alpha\text{CD40}$ -treated GL261 tumor-bearing mice. Red circle indicates one  $\alpha\text{CD40}$ -treated mouse.  $n(\text{mice})=25$ ;  $n(\text{independent experiments})=3$ . **(j)** Representative images of dense  $\text{CD45}^+\text{B220}^+$  clusters before (top panel) and after (bottom panel) laser capture microdissection. Scale bars: 50  $\mu\text{m}$ . **(k)** Gene expression of *Ccl21* in laser capture micro-dissected  $\text{CD45}^+\text{B220}^+$  clusters, compared with laser capture micro-dissected tumor tissue and normal brain tissue.  $n(\text{LMD areas})=4/\text{group}$ . One way ANOVA with Tukey’s multiple comparison correction. Black circle indicates TLS, black square indicates tumor and black triangle indicates healthy brain tissue. arb. units = arbitrary units. **(l-o)** Immunofluorescent stainings of  $\alpha\text{CD40}$ -induced TLS in the CT-2A model showing TLS composition and organization. Arrows in (l) indicate a majority of  $\text{Ki67}^+$  T cells (white arrows) and one  $\text{Ki67}^+$  B cell (yellow arrow). The images are representative of two independent experiments and 4 mice. Scale bars: 50  $\mu\text{m}$ . For all graphs in this figure, Bars:  $\text{mean}\pm\text{SEM}$ . Source data are provided as a Source Data file.



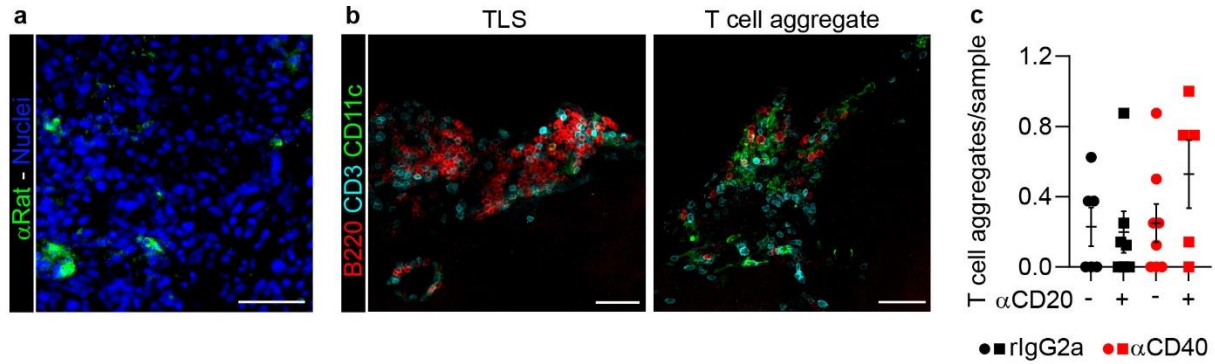

**Supplementary Fig. 2: B cells were necessary for  $\alpha$ CD40-mediated TLS induction.**

**(a)** Immunofluorescent staining showing cells in the tumor area which are positive for the therapeutic  $\alpha$ CD40 antibody. **(b)** Representative images showing the difference in composition between a TLS and a T cell aggregate in the meninges. TLS showed a clear B cell core surrounded by fewer T cells and scattered DCs, while T cell aggregates were infiltrated with only few B cells and comprised of a clear network of DCs. Scale bars: 50  $\mu$ m. **(c)** Quantification of aggregates of T cells close to the meningeal layer in the indicated treatment groups. n(rIgG2a)=6mice; n(rIgG2a+ $\alpha$ CD20)=7mice; n( $\alpha$ CD40)=8mice; n( $\alpha$ CD40+ $\alpha$ CD20)=5mice. One way ANOVA with Tukey multiple correction. Bars: mean $\pm$ SEM. Black circle indicates rat IgG2a (rIgG2a), black square indicates rIgG2a+ $\alpha$ CD20, red circle indicates agonistic CD40 antibodies ( $\alpha$ CD40), red square indicates  $\alpha$ CD40+ $\alpha$ CD20. Source data are provided as a Source Data file.

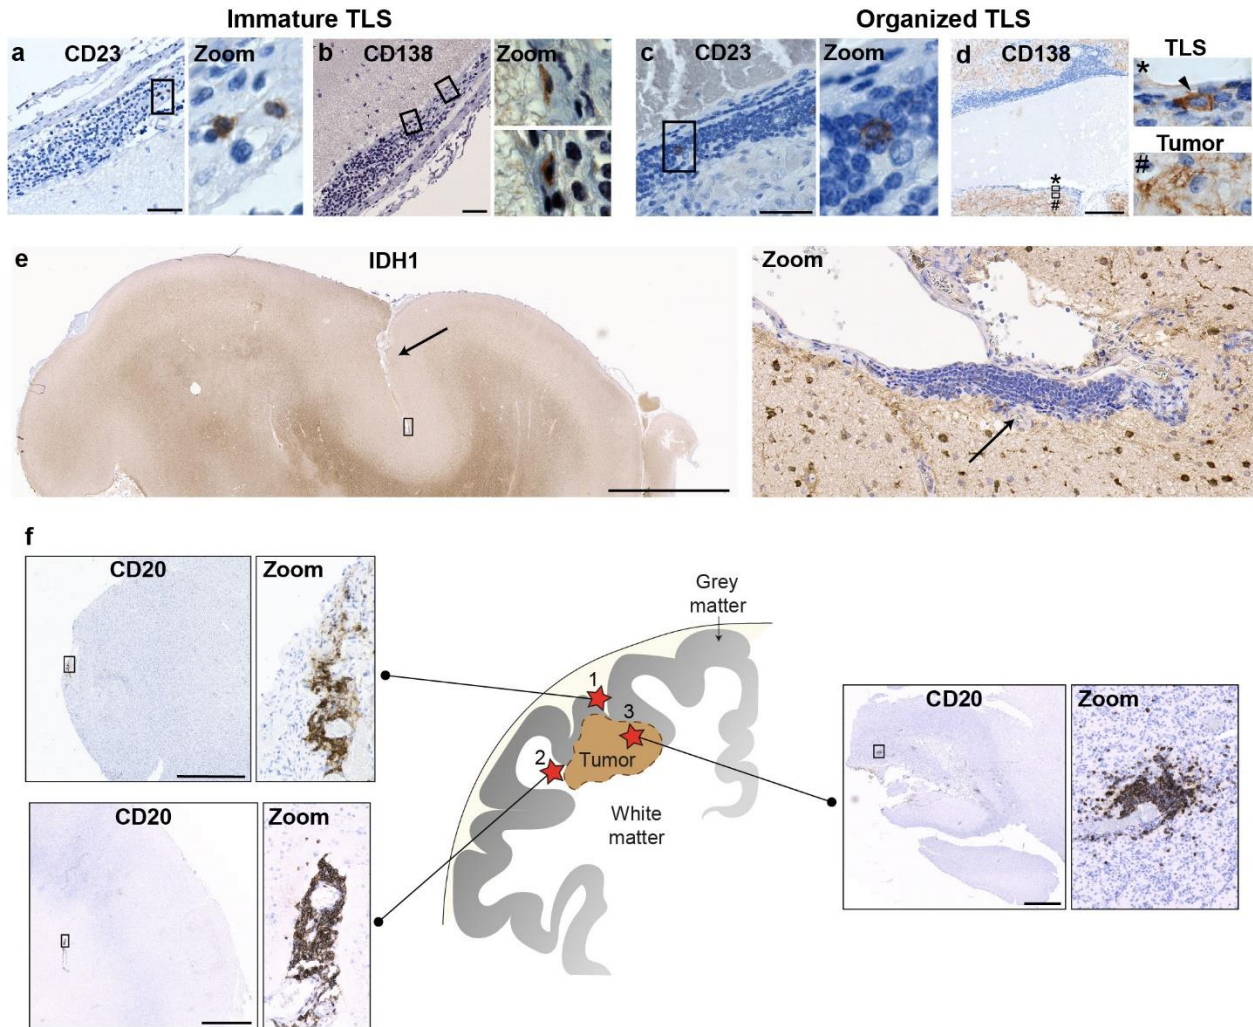

**Supplementary Fig. 3: TLS composition and location in glioma patients.**

(a-d) Immunohistochemical staining showing the presence of rare (a,c) CD23<sup>+</sup> follicular B cells and (b,d) CD138<sup>+</sup> plasma cells in immature and organized TLS. Stainings were performed on one representative immature TLS and one representative organized TLS. Zoom areas in (a-d) are indicated by black squares and the relative zoom panels are shown to the right of each image. The zoom panel indicated by an asterisk shows a CD138<sup>+</sup> plasma cell inside the TLS. The zoom panel indicated by a hash shows CD138<sup>int</sup> glioma cells in the tumor area. Scale bars: (a-c) 50µm, (d) 200 µm. (e) A dense cluster of nuclei in the depth of a cerebral sulcus, identified in a section obtained from a WHO Grade II oligodendroglioma (patient 6, Supplementary Table 1) that stained positive for mutated isocitrate dehydrogenase 1 (IDH1). The black square area in (e) is magnified to the right. Arrow in (e): cerebral sulcus. Arrow in zoom panel: dense cluster of nuclei. Scale bar: 5 mm. Stainings were performed in 4 patients. (f) Schematic representation of the locations where TLS were observed in human glioma samples: 1) in close proximity to the meninges, 2) in the white matter, close to the tumor and 3) inside the tumor tissue. For each location, a representative immunohistochemical staining is shown. This includes an overview of the tissue, where TLS location is indicated by a black square. A zoom of the square area is shown to the right. Scale bars: 2 mm. Stainings were performed in 26 patients.

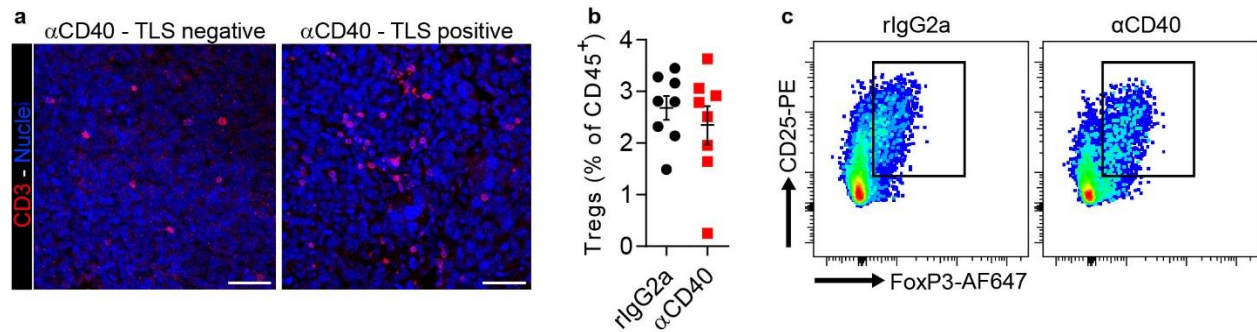

**Supplementary Fig. 4: T cell characterization in  $\alpha$ CD40-treated mice.**

**(a)** Representative images of T cell infiltration in  $\alpha$ CD40-treated GL261 tumors that stained positive or negative for TLS. Scale bar: 50  $\mu$ m. **(b)** Quantification of CD25<sup>+</sup>FoxP3<sup>+</sup> Tregs as a percentage of CD45<sup>+</sup> cells in GL261 tumors treated with rIgG2a or  $\alpha$ CD40. n=8mice/group. Two-tailed *t*-test. Bars: mean $\pm$ SEM. Black circle indicates rat rIgG2a (rIgG2a), red square indicates agonistic CD40 antibodies ( $\alpha$ CD40). **(c)** Representative FACS plots of the CD3<sup>+</sup>CD4<sup>+</sup>CD25<sup>+</sup>FoxP3<sup>+</sup> T cell population quantified in (b). Source data are provided as a Source Data file.

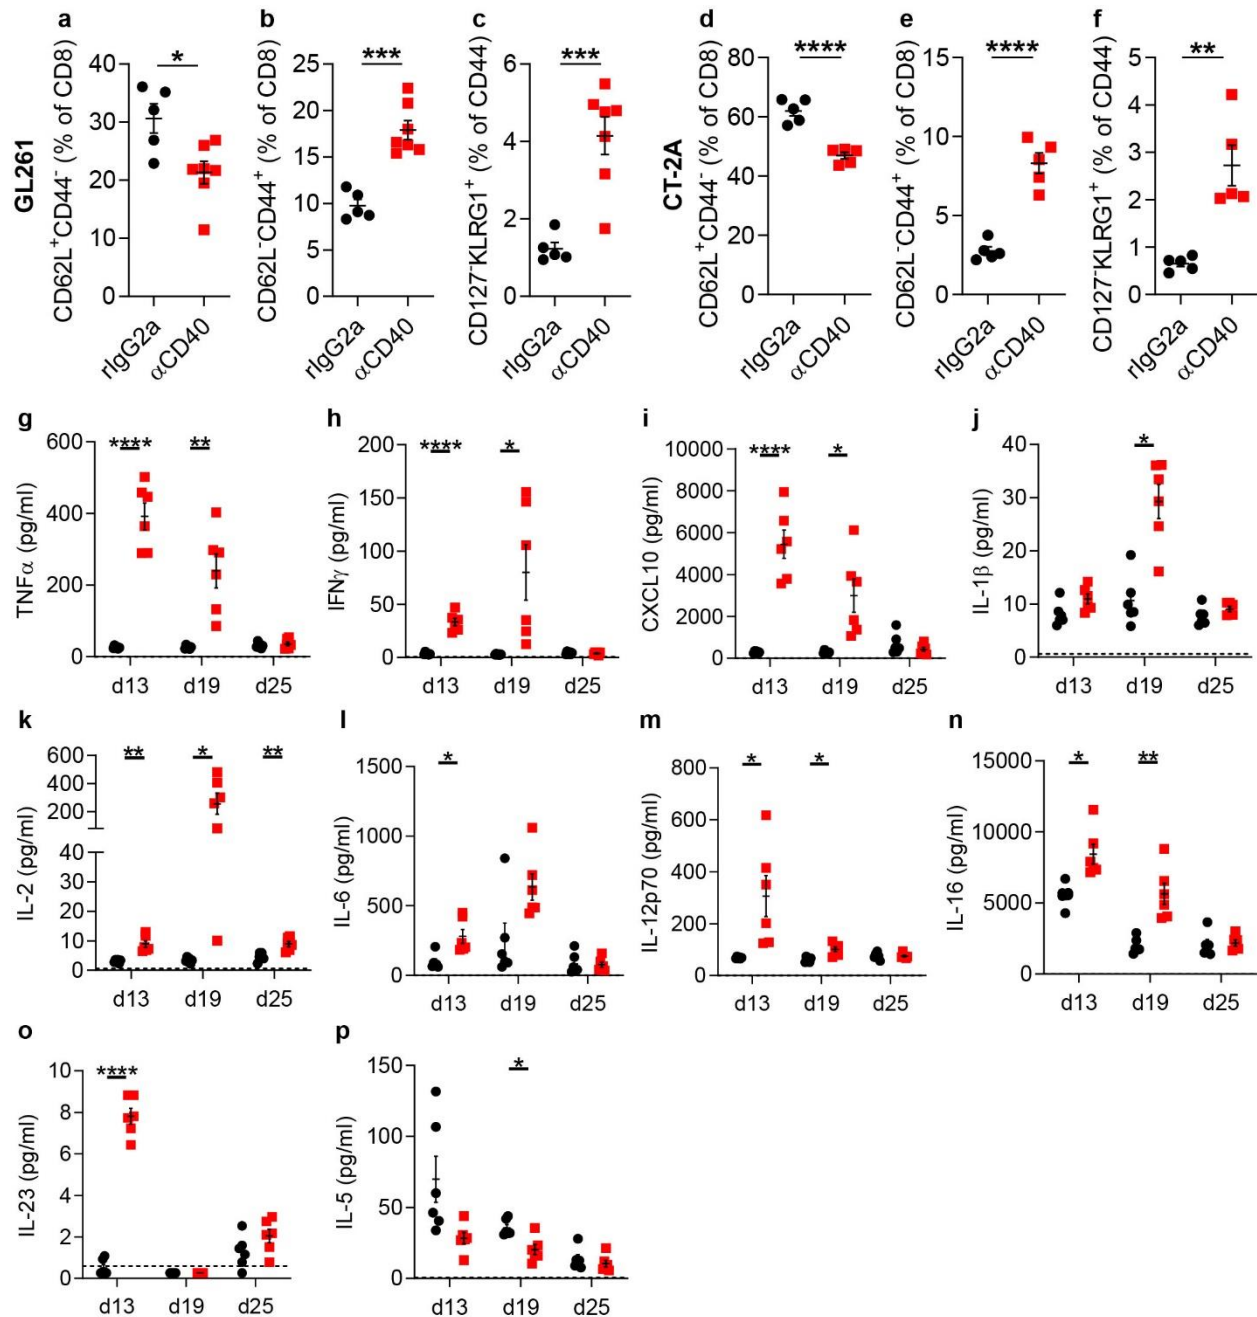

**Supplementary Fig. 5: Systemic response to αCD40 therapy.**

All data was obtained from mice that received rlgG2a or αCD40 antibodies on days 10, 13, 16 and 19 post-tumor implantation. **(a-f)** Quantifications obtained from spleens of GL261 and CT-2A tumor-bearing mice. n(GL261-rlgG2a)&(CT-2A)=5mice/group; n(GL261 αCD40)=7mice; Two tailed *t*-test. **(a,d)** Quantification of CD62L<sup>+</sup>CD44<sup>-</sup> T cells as a percentage of CD8<sup>+</sup> cells. **(b,e)** Quantification of CD62L<sup>-</sup>CD44<sup>+</sup> T cells as a percentage of CD8<sup>+</sup> cells. **(c,f)** Quantification of CD127<sup>+</sup>KLRG1<sup>+</sup> cells as a percentage of CD8<sup>+</sup>CD44<sup>+</sup> T cells. In (a) p=0.0135. In (b) p=0.0001. In (c) p=0.0007. In (d-e) p<0.0001. In (f) p=0.0014. **(g-q)** Systemic cytokine levels of **(g)** TNFα, **(h)** IFNγ, **(i)** CXCL10, **(j)** IL-1β, **(k)** IL-2, **(l)** IL-6, **(m)** IL-12p70, **(n)** IL-16, **(o)** IL-23 and **(p)** IL-5 in the serum of GL261 tumor-bearing mice on day 13, day 19 and day 25 post-tumor implantation. The dashed line indicates the lower limit of detection. n=6mice/group. Multiple *t*-test with Sidak-Bonferroni's correction for multiple comparisons. In (g) p<sub>(d13)</sub><0.0001, p<sub>(d19)</sub>=0.0035. In (h)

$p_{(d13)} < 0.0001$ ,  $p_{(d19)} < 0.0426$ . In (i)  $p_{(d13)} < 0.0001$ ,  $p_{(d19)} = 0.0198$ . In (j)  $p_{(d19)} = 0.0016$ . In (k)  $p_{(d13)} = 0.0015$ ,  $p_{(d19)} = 0.0202$ ,  $p_{(d25)} = 0.0054$ . In (l)  $p_{(d13)} = 0.0211$ . In (m)  $p_{(d13)} = 0.0387$ ,  $p_{(d19)} = 0.0123$ . In (n)  $p_{(d13)} = 0.0111$ ,  $p_{(d19)} = 0.0026$ . In (o)  $p_{(d13)} < 0.0001$ . In (p)  $p_{(d19)} = 0.0147$ . For all graphs in this figure: Bars: mean  $\pm$  SEM. Black circle indicates rat IgG2a (rIgG2a), red square indicates agonistic CD40 antibodies ( $\alpha$ CD40). \* $p < 0.05$ , \*\* $p < 0.01$ , \*\*\* $p < 0.001$ , \*\*\*\* $p < 0.0001$ . Source data are provided as a Source Data file.

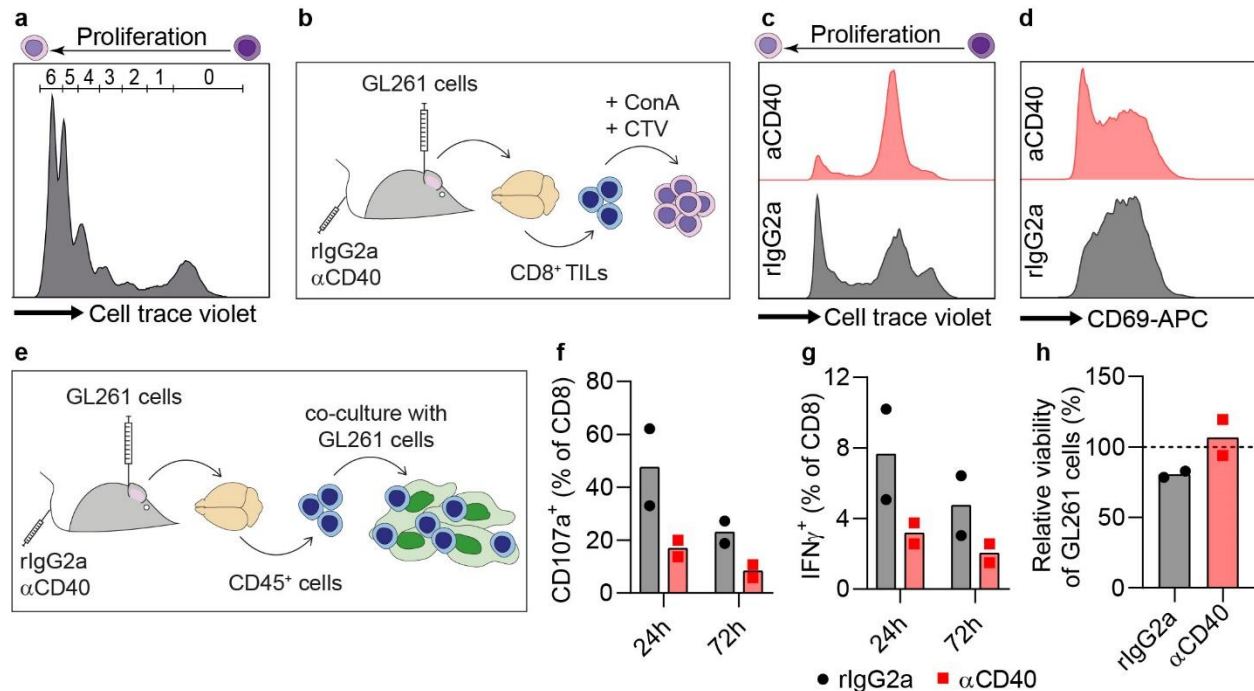

**Supplementary Fig. 6:  $\alpha$ CD40 induced a hypofunctional T cell phenotype in glioma-bearing mice.**

**(a)** Example of how generations of proliferating CD8<sup>+</sup> T splenocytes were defined based on cell trace violet staining. Each peak represents one generation. Generation 0 corresponds to the highest intensity peak, where cells did not divide. Generation 6 corresponds to the lowest intensity peak, where cells have divided roughly 6 times. **(b)** Schematic illustration of the experimental layout used to obtain data shown in panels (c-d). In brief, GL261 glioma-bearing mice were treated with rIgG2a or  $\alpha$ CD40 antibodies on days 10, 13, 16 and 19 post-tumor implantation. On day 22, the mice were sacrificed and CD8<sup>+</sup> T cells were isolated from the brain, stained with cell trace violet (CTV) to assess proliferation and re-stimulated *in vitro* with concanavalin A (ConA) for 24h and 72h. **(c)** Histogram showing the proportion of CD8<sup>+</sup> T cells in each proliferation peak based on CTV staining. **(d)** Histogram showing CD69 protein levels on the CD8<sup>+</sup> T cell population. (c-d) are representative of 2 mice/group. **(e)** Schematic illustration of the experimental layout used to obtain data shown in panels (f-h). In brief, GL261 glioma-bearing mice were treated with rIgG2a or  $\alpha$ CD40 antibodies on days 10, 13, 16 and 19 post-tumor implantation. On day 22, the mice were sacrificed and CD45<sup>+</sup> T cells were isolated from the brain and co-cultured with GL261 cells *in vitro* for 24 and 72h. **(f-g)** Percentages of **(f)** CD107a<sup>+</sup> and **(g)** IFN $\gamma$ <sup>+</sup> CD8<sup>+</sup> T cells in rIgG2a and  $\alpha$ CD40 groups at the indicated time-points. **(h)** Relative viability of GL261 cells after 72h of co-culture. For all graphs in this figure: n=2mice/group. Bars: mean. Black circle indicates rat IgG2a (rIgG2a), red square indicates agonistic CD40 antibodies ( $\alpha$ CD40). Source data are provided as a Source Data file.

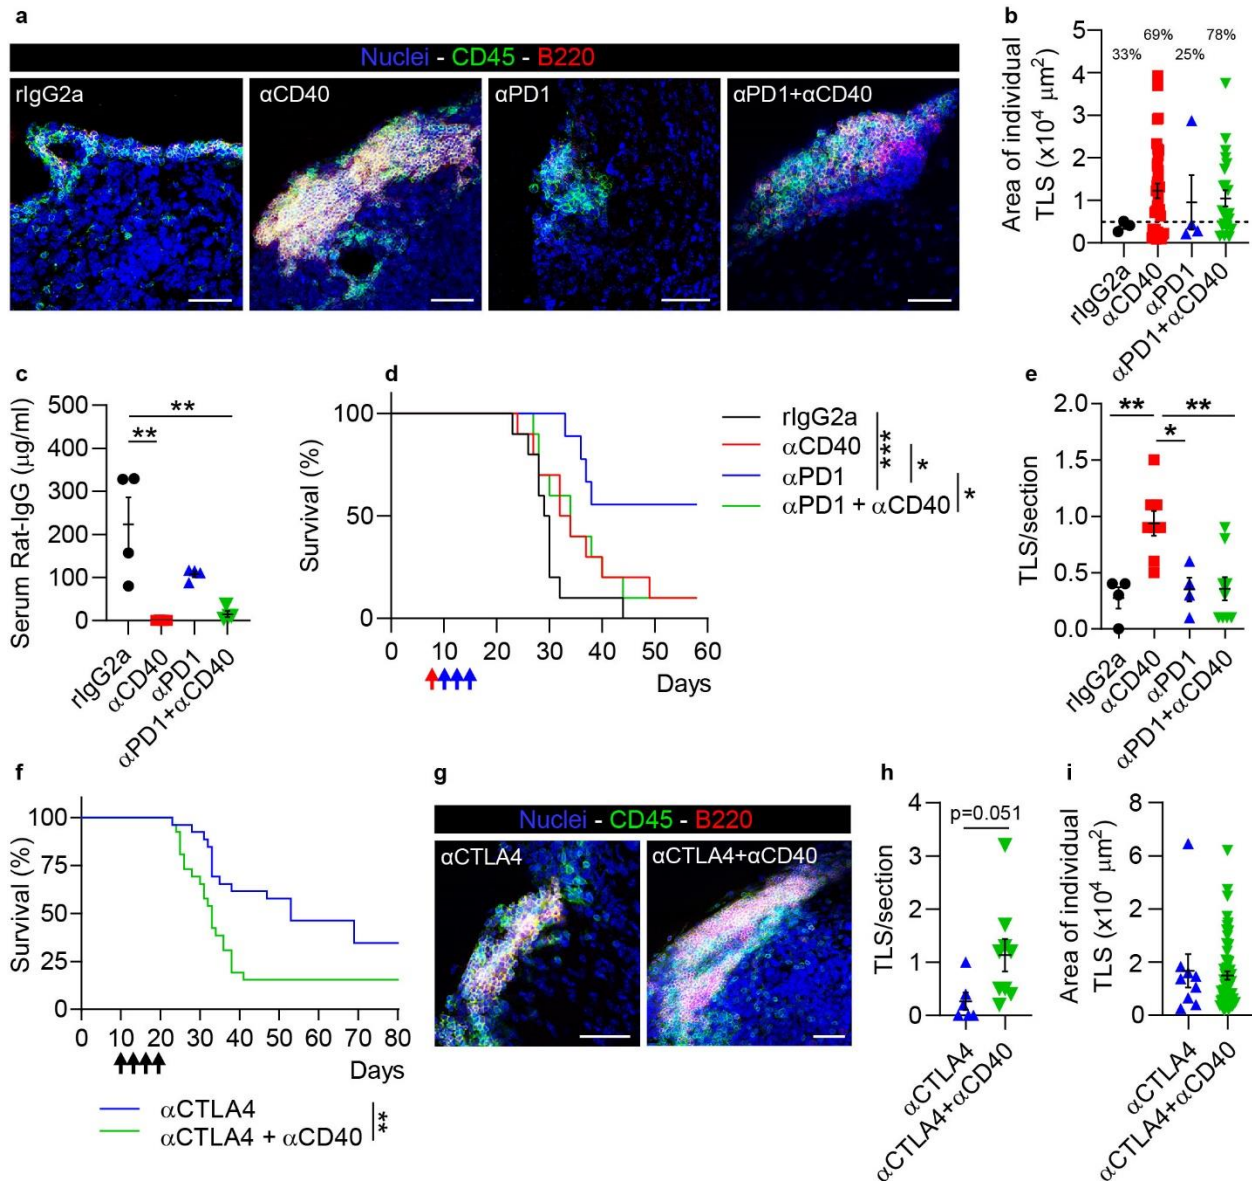

**Supplementary Fig. 7: αCD40 impairs the response to PD-1 and CTLA-4 checkpoint blockade.**

All data shown in this figure was obtained from GL261 glioma-bearing mice. In all panels except (d-e), αCD40 was administered in a sequential treatment regimen (on days 10, 13, 16 and 19). **(a)** Representative image of TLS in the indicated treatment groups. Scale bar: 50μm. **(b)** Quantification of the CD45<sup>+</sup> surface area of each individual TLS for the indicated treatment groups. Data points indicate individual TLS areas. The dotted line indicates the mean+SD of the rlgG2a group. Percentages indicate the proportion of TLS that were larger than the mean+SD of the rlgG2a group in each treatment group. n(rlgG2a)=3 TLS; n(αCD40)=36 TLS; n(αPD1)=4 TLS; n(αCD40+αPD1)=23 TLS. **(c)** Serum levels of rat antibodies (Rat IgG) in the indicated treatment groups on day 19 post-tumor implantation. n=4mice/group.  $p_{(rlgG2a \text{ vs } \alpha CD40)}=0.0016$ ,  $p_{(rlgG2a \text{ vs } \alpha PD1+\alpha CD40)}=0.0027$ . One way ANOVA with Tukey's multiple correction. **(d)** Kaplan–Meier survival curve of mice treated with a single dose of αCD40 on day 9 or treated with a single dose of αCD40 on day 9 followed by three doses of αPD1 antibodies on days 10, 13 and 16 (as indicated by red and blue arrows, respectively). n(rlgG2a)&(αCD40)&(αPD1+αCD40)=10mice/group. n(αPD1)=9mice.  $p_{(rlgG2a \text{ vs } \alpha PD1)}=0.0003$ ,  $p_{(\alpha CD40 \text{ vs } \alpha PD1)}=0.0263$ ,  $p_{(\alpha PD1 \text{ vs } \alpha PD1+ \alpha CD40)}=0.0358$ . Log rank test. **(e)** Quantification of the number of TLS for the indicated treatment groups. n(rlgG2a)&(αPD1)=4mice; n(αCD40)=8mice; n(αPD1+αCD40)=9mice.  $p_{(rlgG2a \text{ vs } \alpha PD1)}=0.0003$ ,  $p_{(\alpha CD40 \text{ vs } \alpha PD1)}=0.0263$ ,  $p_{(\alpha PD1 \text{ vs } \alpha PD1+ \alpha CD40)}=0.0358$ . Log rank test. **(f)** Kaplan–Meier survival curve of mice treated with a single dose of αCTLA4 on day 9 or treated with a single dose of αCTLA4 on day 9 followed by three doses of αCD40 antibodies on days 10, 13 and 16 (as indicated by red and blue arrows, respectively). n(αCTLA4)&(αCD40)=10mice/group. n(αCD40)=8mice; n(αCTLA4+αCD40)=9mice.  $p_{(\alpha CTLA4 \text{ vs } \alpha CD40)}=0.0003$ ,  $p_{(\alpha CD40 \text{ vs } \alpha CTLA4)}=0.0263$ ,  $p_{(\alpha CTLA4 \text{ vs } \alpha CTLA4+ \alpha CD40)}=0.0358$ . Log rank test. **(g)** Representative image of TLS in the indicated treatment groups. Scale bar: 50μm. **(h)** Quantification of the number of TLS for the indicated treatment groups. n(αCTLA4)=4mice; n(αCTLA4+αCD40)=9mice.  $p_{(\alpha CTLA4 \text{ vs } \alpha CTLA4+ \alpha CD40)}=0.051$ . **(i)** Quantification of the area of individual TLS for the indicated treatment groups. n(αCTLA4)=4mice; n(αCTLA4+αCD40)=9mice.  $p_{(\alpha CTLA4 \text{ vs } \alpha CTLA4+ \alpha CD40)}=0.051$ .

$\alpha$ CD40)=0.005,  $p_{(\alpha$ CD40 vs  $\alpha$ PD1)=0.0135,  $p_{(\alpha$ CD40 vs  $\alpha$ PD1+ $\alpha$ CD40)=0.0019. One way ANOVA with Tukey's multiple correction. **(f)** Kaplan–Meier survival curve of mice treated with  $\alpha$ CTLA-4 antibodies and/or  $\alpha$ CD40 antibodies on days 10, 13, 16 and 19 (as indicated by arrows). n=26mice/group.p=0.0019. Log rank test; . **(g)** Representative image of TLS in the indicated treatment groups. Scale bar: 50 $\mu$ m. **(h,i)** Quantification of **(h)** the number and **(i)** the CD45<sup>+</sup> surface area of each individual TLS for the indicated treatment groups. Two-tailed *t*-test. In (h) n( $\alpha$ CTLA-4)=6mice; n( $\alpha$ CTLA-4+ $\alpha$ CD40)=9mice. In (i) n( $\alpha$ CTLA-4)=9 TLS, n( $\alpha$ CTLA-4+ $\alpha$ CD40)=61 TLS. In (b-c) and (e), black circle indicates rat IgG2a (rIgG2a), red square indicates agonistic CD40 antibodies ( $\alpha$ CD40), blue triangle (pointing up) indicates PD1 blocking antibodies ( $\alpha$ PD1), green triangle (pointing down) indicates  $\alpha$ PD1+ $\alpha$ CD40. In (h-i) blue triangle (pointing up) indicates CTLA-4 blocking antibodies ( $\alpha$ CTLA-4), green triangle (pointing down) indicates  $\alpha$ CTLA-4+ $\alpha$ CD40. For all graphs in this figure, \* $p$ <0.05, \*\* $p$ < 0.01, \*\*\* $p$  < 0.001. Bars: mean $\pm$ SEM. Source data are provided as a Source Data file.



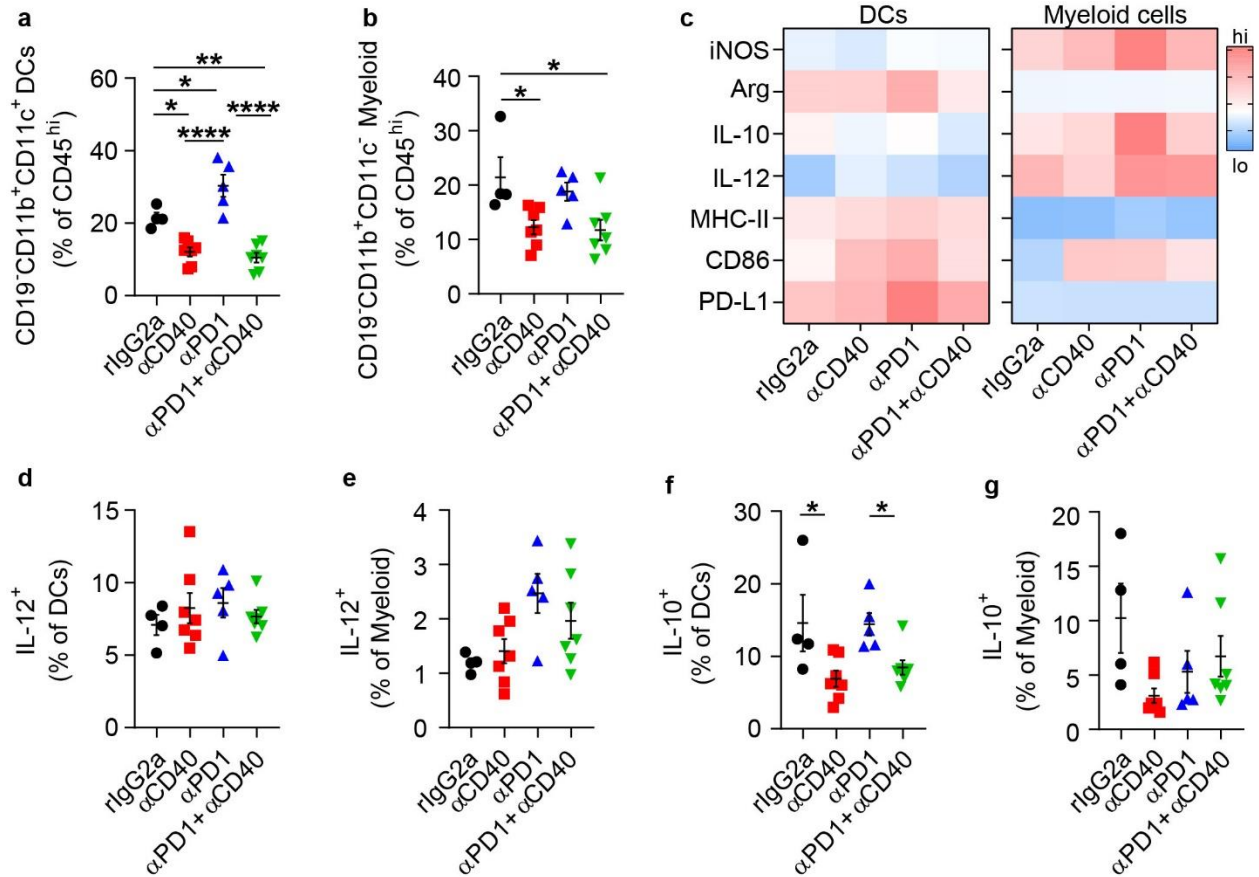

**Supplementary Fig. 8:  $\alpha$ CD40 activated brain-infiltrating dendritic cells and myeloid cells.**

Phenotypic analysis of myeloid subtypes in GL261 glioma-bearing mice. **(a,b)** Quantification of **(a)** CD19<sup>-</sup>CD11b<sup>+</sup>CD11c<sup>+</sup> dendritic cells (DCs) and **(b)** CD19<sup>-</sup>CD11b<sup>+</sup>CD11c<sup>-</sup> myeloid cells as a percentage of immune cells in the brain of mice in the indicated treatment groups. In **(a)**  $p(\text{rIgG2a vs } \alpha\text{CD40})=0.0108$ ,  $p(\text{rIgG2a vs } \alpha\text{PD1})=0.0290$ ,  $p(\text{rIgG2a vs } \alpha\text{PD1}+\alpha\text{CD40})=0.0030$ ,  $p(\alpha\text{CD40 vs } \alpha\text{PD1})<0.0001$ ,  $p(\alpha\text{PD1 vs } \alpha\text{PD1}+\alpha\text{CD40})<0.0001$ . In **(b)**  $p(\text{rIgG2a vs } \alpha\text{CD40})=0.0332$ ,  $p(\text{rIgG2a vs } \alpha\text{PD1}+\alpha\text{CD40})=0.0229$ . **(c)** Heatmap showing the expression levels (z-score) of activation and immunosuppression markers on DCs and myeloid cells in the brain of mice in the indicated treatment groups. **(d-e)** Quantification of IL-12<sup>+</sup> cells as a percentage of **(d)** DCs and **(e)** myeloid cells in the brain of mice in the indicated treatment groups. **(f-g)** Quantification of IL-10<sup>+</sup> cells as a percentage of **(f)** DCs and **(g)** myeloid cells in the brain of mice in the indicated treatment groups. In **(f)**  $p(\text{rIgG2a vs } \alpha\text{CD40})=0.0382$ ,  $p(\alpha\text{CD40 vs } \alpha\text{PD1})=0.0287$ . For all graphs in this figure,  $n(\text{rIgG2a})=4$  mice;  $n(\alpha\text{CD40})\&(\alpha\text{PD1}+\alpha\text{CD40})=7$  mice;  $n(\alpha\text{PD1})=5$  mice. One way ANOVA with Tukey's multiple correction. \* $p<0.05$ , \*\* $p<0.01$ , \*\*\*\* $p<0.0001$ . Bars: mean $\pm$ SEM. Black circle indicates rat IgG2a (rIgG2a), red square indicates agonistic CD40 antibodies ( $\alpha$ CD40), blue triangle (pointing up) indicates PD1 blocking antibodies ( $\alpha$ PD1), green triangle (pointing down) indicates  $\alpha$ PD1+ $\alpha$ CD40. Source data are provided as a Source Data file.

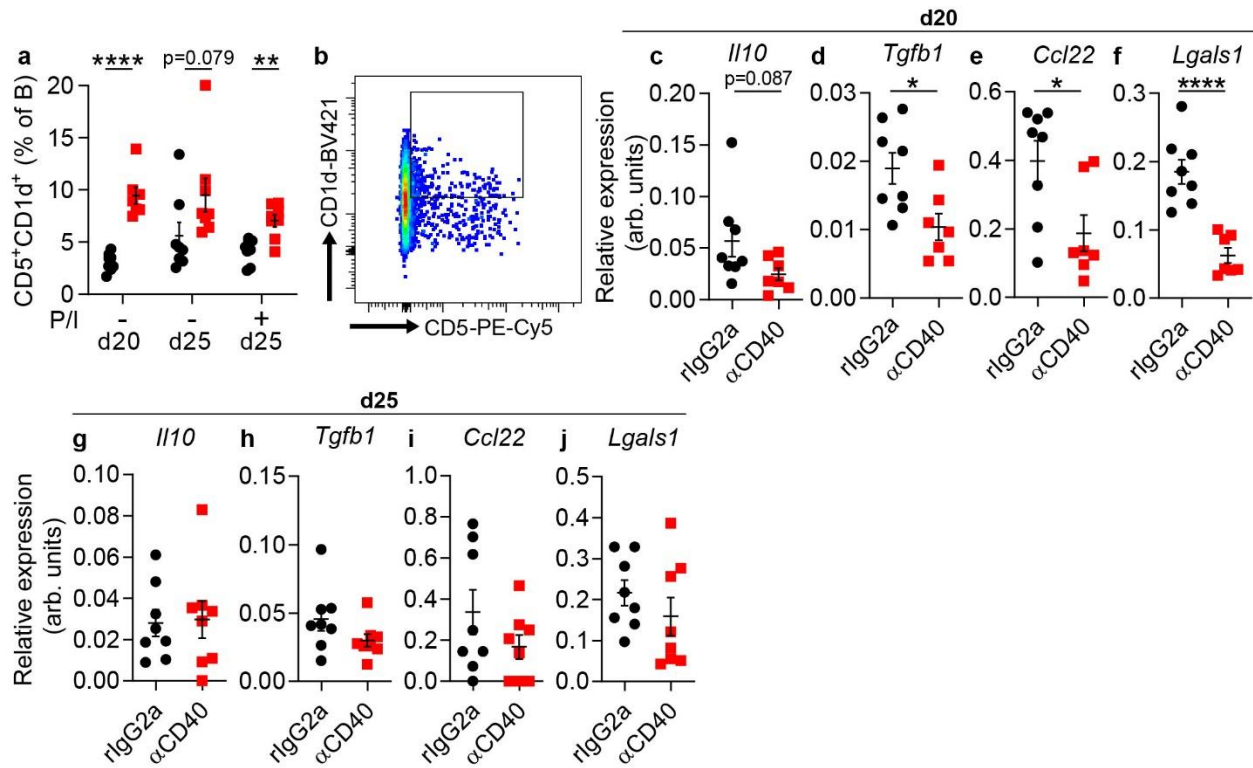

**Supplementary Fig. 9:  $\alpha$ CD40 therapy did not increase the expression of soluble immunosuppressive factors in B cells.** Analysis of regulatory molecules on B cells in GL261 tumors. **(a)** CD5<sup>+</sup>CD1d<sup>+</sup> cells as a percentage of CD19<sup>+</sup>B220<sup>+</sup> B cells on day 20 and on day 25 post-tumor implantation, with or without 5h stimulation with PMA and Ionomycin (P/I). n=8mice/group in all groups except n( $\alpha$ CD40-d20)=7mice.  $p_{(d20)} < 0.0001$ ,  $p_{(d25+P/I)} = 0.0012$ . Two-tailed *t*-test. **(b)** Representative plots of the CD1d<sup>+</sup>CD5<sup>+</sup> B cell population quantified in (a). **(c-f)** Gene expression of *Il10*, *Tgfb1*, *Ccl22* and *Lgals1* on B cells sorted on day 20 post-tumor implantation. n(rIgG2a)=8mice; n( $\alpha$ CD40)=7mice. In (d)  $p = 0.0145$ . In (e)  $p = 0.0216$ . In (f)  $p < 0.0001$ . **(g-j)** Gene expression of *Il10*, *Tgfb1*, *Ccl22* and *Lgals1* on B cells sorted on day 25 post-tumor implantation. n=8mice/group. (c-j) arb. units = arbitrary units. Two-tailed *t*-test. For all graphs in this figure: \* $p < 0.05$ , \*\* $p < 0.01$ , \*\*\* $p < 0.001$ , \*\*\*\* $p < 0.0001$ . Bars: mean $\pm$ SEM. Black circle indicates rat IgG2a (rIgG2a), red square indicates agonistic CD40 antibodies ( $\alpha$ CD40). Source data are provided as a Source Data file.

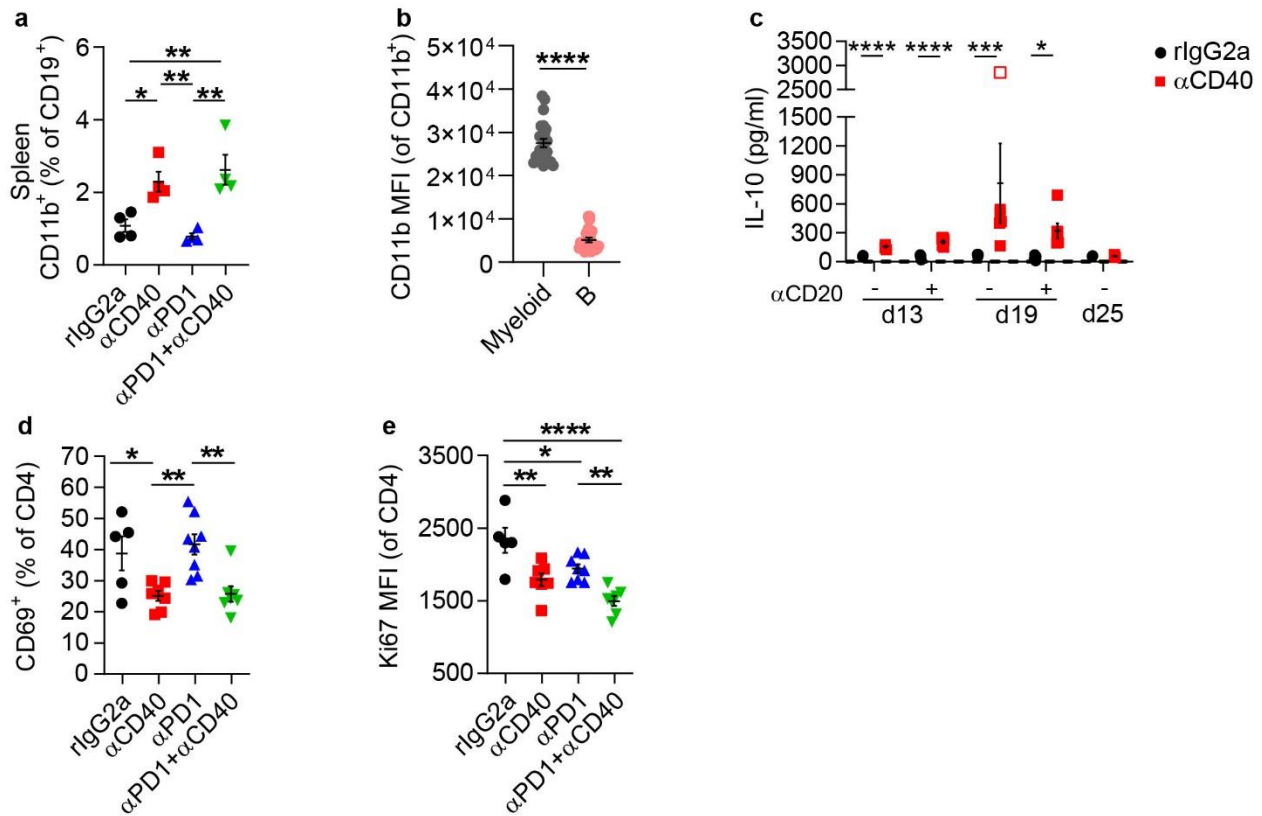

**Supplementary Fig. 10: αCD40 therapy induced CD11b<sup>+</sup> B cells and suppressed CD4<sup>+</sup> T cells.**

All figure panels show data from GL261 glioma-bearing mice. **(a)** Quantification of CD11b<sup>+</sup> cells as a percentage of B cells in the spleen, in the indicated treatment groups. n=4mice/group.  $p_{(rIgG2a \text{ vs } \alpha CD40)}=0.0334$ ,  $p_{(rIgG2a \text{ vs } \alpha PD1+\alpha CD40)}=0.0073$ ,  $p_{(\alpha CD40 \text{ vs } \alpha PD1)}=0.0083$ ,  $p_{(\alpha PD1 \text{ vs } \alpha PD1+\alpha CD40)}=0.0019$ . One way ANOVA with Tukey's correction for multiple comparisons. **(b)** Mean fluorescence intensity (MFI) of CD11b on CD11b<sup>+</sup> myeloid cells versus CD11b<sup>+</sup> B cells in the brain. Data were merged from rIgG2a, αCD40, αPD1 and αCD40+αPD1 treatment groups. n=23mice.  $p<0.0001$ . Two-tailed *t*-test. **(c)** Systemic levels of IL-10 on days 13, 19 and 25 post-tumor implantation, after treatment with rIgG2a or αCD40 antibodies, with or without B cell depletion using an αCD20 antibody. The dashed line indicates the lower limit of detection. The data point marked as an empty red square was determined to be an outlier using the Grubbs test, thus it was excluded from the statistical analysis. n=6mice/group.  $p_{(d13-\alpha CD20)}<0.0001$ ,  $p_{(d13+\alpha CD20)}<0.0001$ ;  $p_{(d19-\alpha CD20)}=0.0012$ ;  $p_{(d19+\alpha CD20)}=0.0250$ . Multiple *t*-test with Sidak-Bonferroni correction for multiple comparisons. **(d)** Quantification of CD69<sup>+</sup> cells as a percentage of CD4<sup>+</sup> T cells in the brain, in the indicated treatment groups.  $p_{(rIgG2a \text{ vs } \alpha CD40)}=0.0434$ ,  $p_{(\alpha CD40 \text{ vs } \alpha PD1)}=0.0039$ ;  $p_{(\alpha PD1 \text{ vs } \alpha PD1+\alpha CD40)}=0.0056$ . **(e)** Mean fluorescence intensity (MFI) of Ki67 in CD4<sup>+</sup> T cells in the brain, in the indicated treatment groups.  $p_{(rIgG2a \text{ vs } \alpha CD40)}=0.0039$ ,  $p_{(rIgG2a \text{ vs } \alpha PD1)}=0.0395$ ,  $p_{(rIgG2a \text{ vs } \alpha PD1+\alpha CD40)}<0.0001$ ,  $p_{(\alpha PD1 \text{ vs } \alpha PD1+\alpha CD40)}=0.0074$ . In (d-e) n(rIgG2a)=5mice; n(αCD40)&(αPD1+αCD40)=7mice; n(αPD1)=8mice. One way ANOVA with Tukey's correction for multiple comparisons. For all graphs in this figure: \* $p<0.05$ , \*\* $p<0.01$ , \*\*\* $p<0.001$ , \*\*\*\* $p<0.0001$ . Bars: mean±SEM. Black circle indicates rat IgG2a (rIgG2a), red square indicates agonistic CD40 antibodies (αCD40), blue triangle (pointing up) indicates PD1 blocking antibodies (αPD1), green triangle (pointing down) indicates αPD1+αCD40, grey circle indicates myeloid cells (Myeloid), light pink circle indicates B cells (B). Source data are provided as a Source Data file.

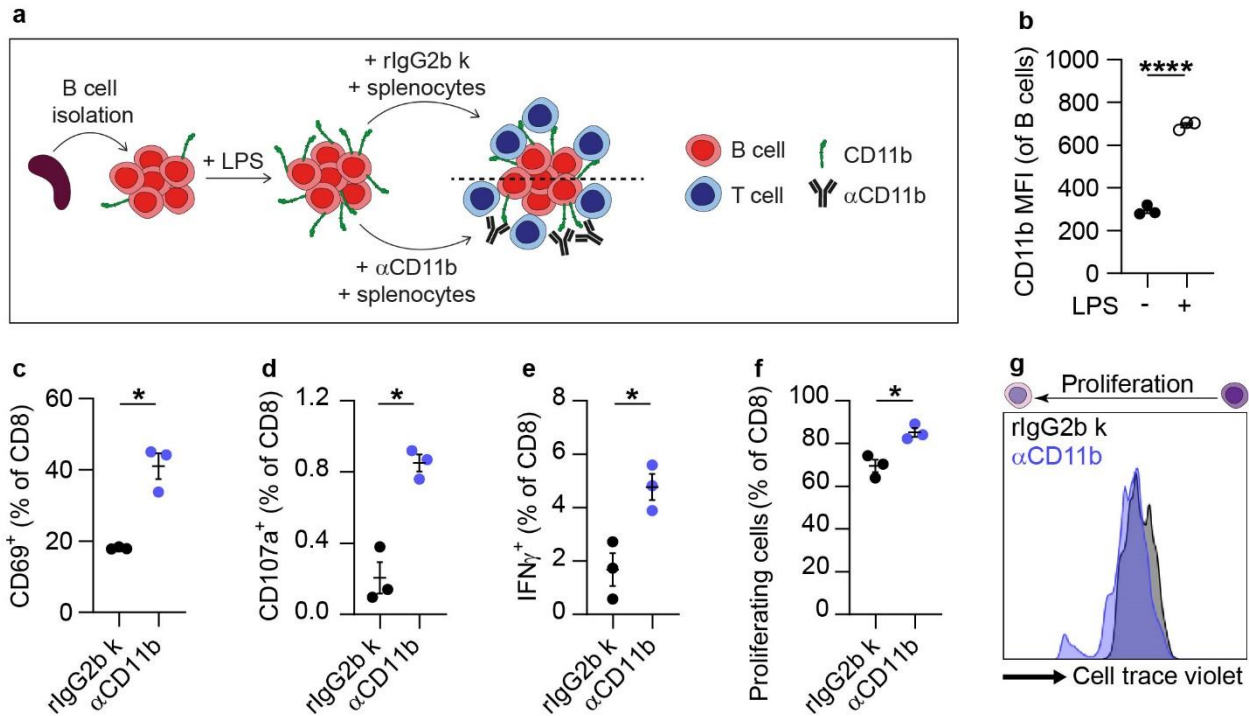

**Supplementary Fig. 11: CD11b expression on B cells inhibits CD8<sup>+</sup> T cell responses.**

**(a)** Schematic illustration of the experimental layout used to obtain data shown in panels (b-g). In brief, B cells were isolated from wt C57BL/6 mice and co-cultured with LPS for 48h to induce upregulation of CD11b. LPS-treated B cells were then co-cultured for 72h with splenocytes in the presence of a control antibody (rIgG2b k) or a CD11b neutralizing antibody. Data on B and T cells were collected by FACS. **(b)** Mean fluorescence intensity (MFI) of CD11b on B cells with (black circle) or without (empty circle) LPS stimulation.  $p < 0.0001$ . **(c-f)** Quantification of **(c)** CD69<sup>+</sup> ( $p = 0.0264$ ), **(d)** CD107a<sup>+</sup> ( $p = 0.0219$ ) **(e)** IFN $\gamma$ <sup>+</sup> ( $p = 0.0369$ ) and **(f)** proliferating cells as a percentage of CD8<sup>+</sup> T cells after co-culture with LPS-induced B cells in the presence of rIgG2b k or an  $\alpha$ CD11b antibody.  $p = 0.0323$ . In (c-f), black circle indicates rat IgG2b k (rIgG2b k), purple circle indicates  $\alpha$ CD11b neutralizing antibody ( $\alpha$ CD11b). **(g)** Representative histogram showing the shift of proliferation peaks on CD8<sup>+</sup> T cells co-cultured with B cells in the presence of a control antibody (rIgG2b k) or of a CD11b-neutralizing antibody. For all graphs in this figure:  $n = 3$  mice/group. Two-tailed  $t$ -test; \* $p < 0.05$ , \*\*\*\* $p < 0.0001$ . Bars: mean  $\pm$  SEM. Source data are provided as a Source Data file.

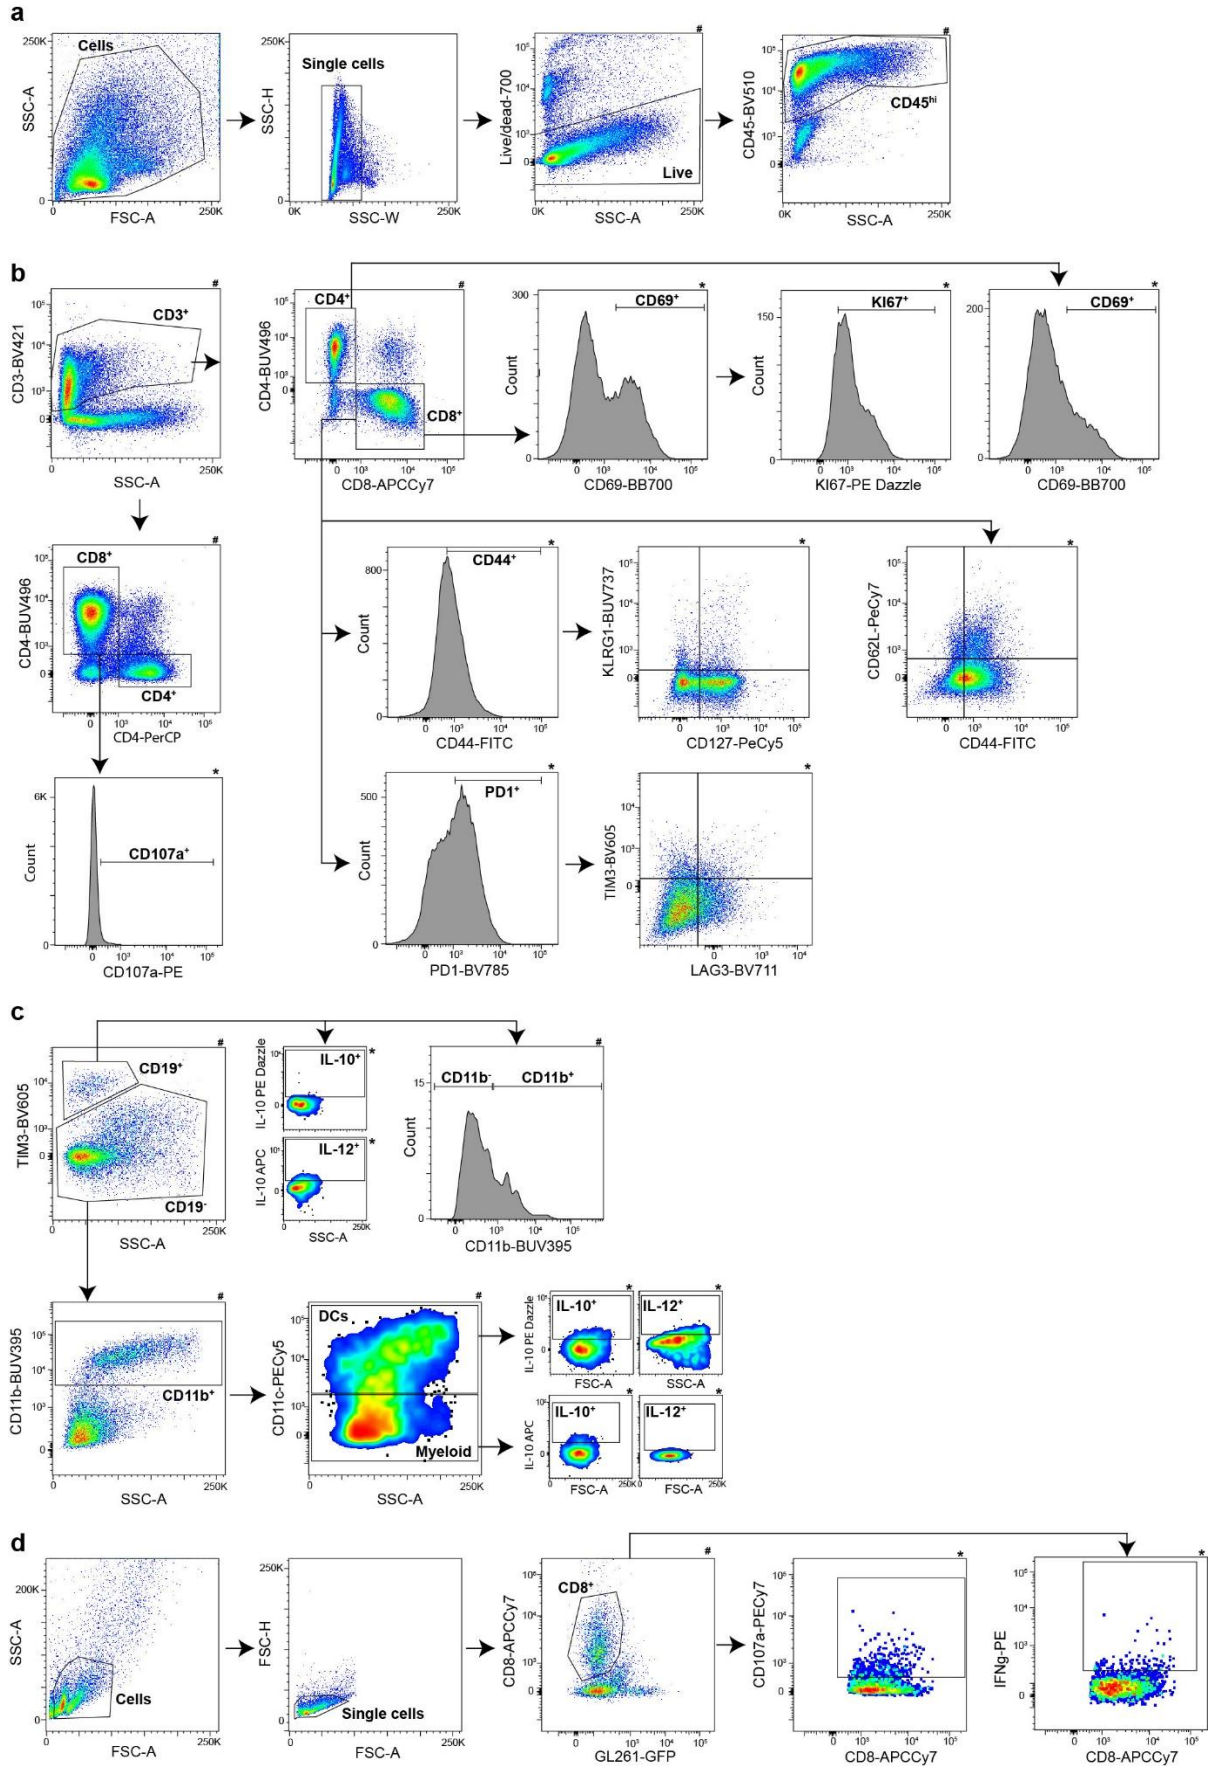

**Supplementary Fig. 12: Gating strategy used for flow cytometry analysis of brain-infiltrating immune cells.**

**(a)** Gating strategy used to select live CD45<sup>high</sup> immune cells from CD45-enriched single cell suspensions obtained from tumor-bearing brains in Fig. 2l-n, 4d-n, 5a-b, 5e-j, 6a-d, 6h-j and Supp. Fig. 4b-c, 8a-g, 9a-b, 10b, 10d-e. **(b)** Gating strategy used to identify CD3<sup>+</sup> T cells, CD8<sup>+</sup> T cells, CD44<sup>+</sup>CD62L<sup>-</sup> CD8 T cells, CD127<sup>-</sup>KLRG1<sup>+</sup> CD8 T cells, CD69<sup>+</sup> CD8 T cells, CD107a<sup>+</sup> CD8 T cells and PD1<sup>+</sup>TIM3<sup>+</sup>LAG3<sup>+</sup> CD8 T cells in Fig. 4d-n, and CD3<sup>+</sup> T cells, CD8<sup>+</sup> T cells and CD69<sup>+</sup>Ki67<sup>+</sup> CD8 T cells in Fig. 5a-b, 5e-j, and CD8<sup>+</sup>, CD4<sup>+</sup> T cells in Fig 6i-j, and CD4<sup>+</sup> T cells, CD69<sup>+</sup> CD4<sup>+</sup> T cells in Supp. Fig. 10d-e. **(c)** Gating strategy used to identify CD19<sup>+</sup> B cells, IL-10<sup>+</sup> B cells, IL-12<sup>+</sup> B cells and CD11b<sup>+</sup> B cells in Fig. 6a-d, and CD19<sup>-</sup>CD11b<sup>+</sup>CD11c<sup>+</sup> DCs, CD19<sup>-</sup>CD11b<sup>+</sup>CD11c<sup>-</sup> myeloid cells, IL-10<sup>+</sup> DCs or myeloid cells, IL-12<sup>+</sup> DCs or myeloid cells in Supp. Fig 4a-g, and CD11b<sup>+</sup> B cells and CD11b<sup>+</sup> myeloid cells in Supp. Fig 10b. **(d)** Gating strategy used to identify CD8<sup>+</sup> T cells, CD107a<sup>+</sup> CD8 T cells, IFN $\gamma$ <sup>+</sup> CD8 T cells in Supp. Fig 6b-g. Asterisk indicates gates based on fluorescent minus one (FMO) controls. Hash indicates gates based on unstained controls.

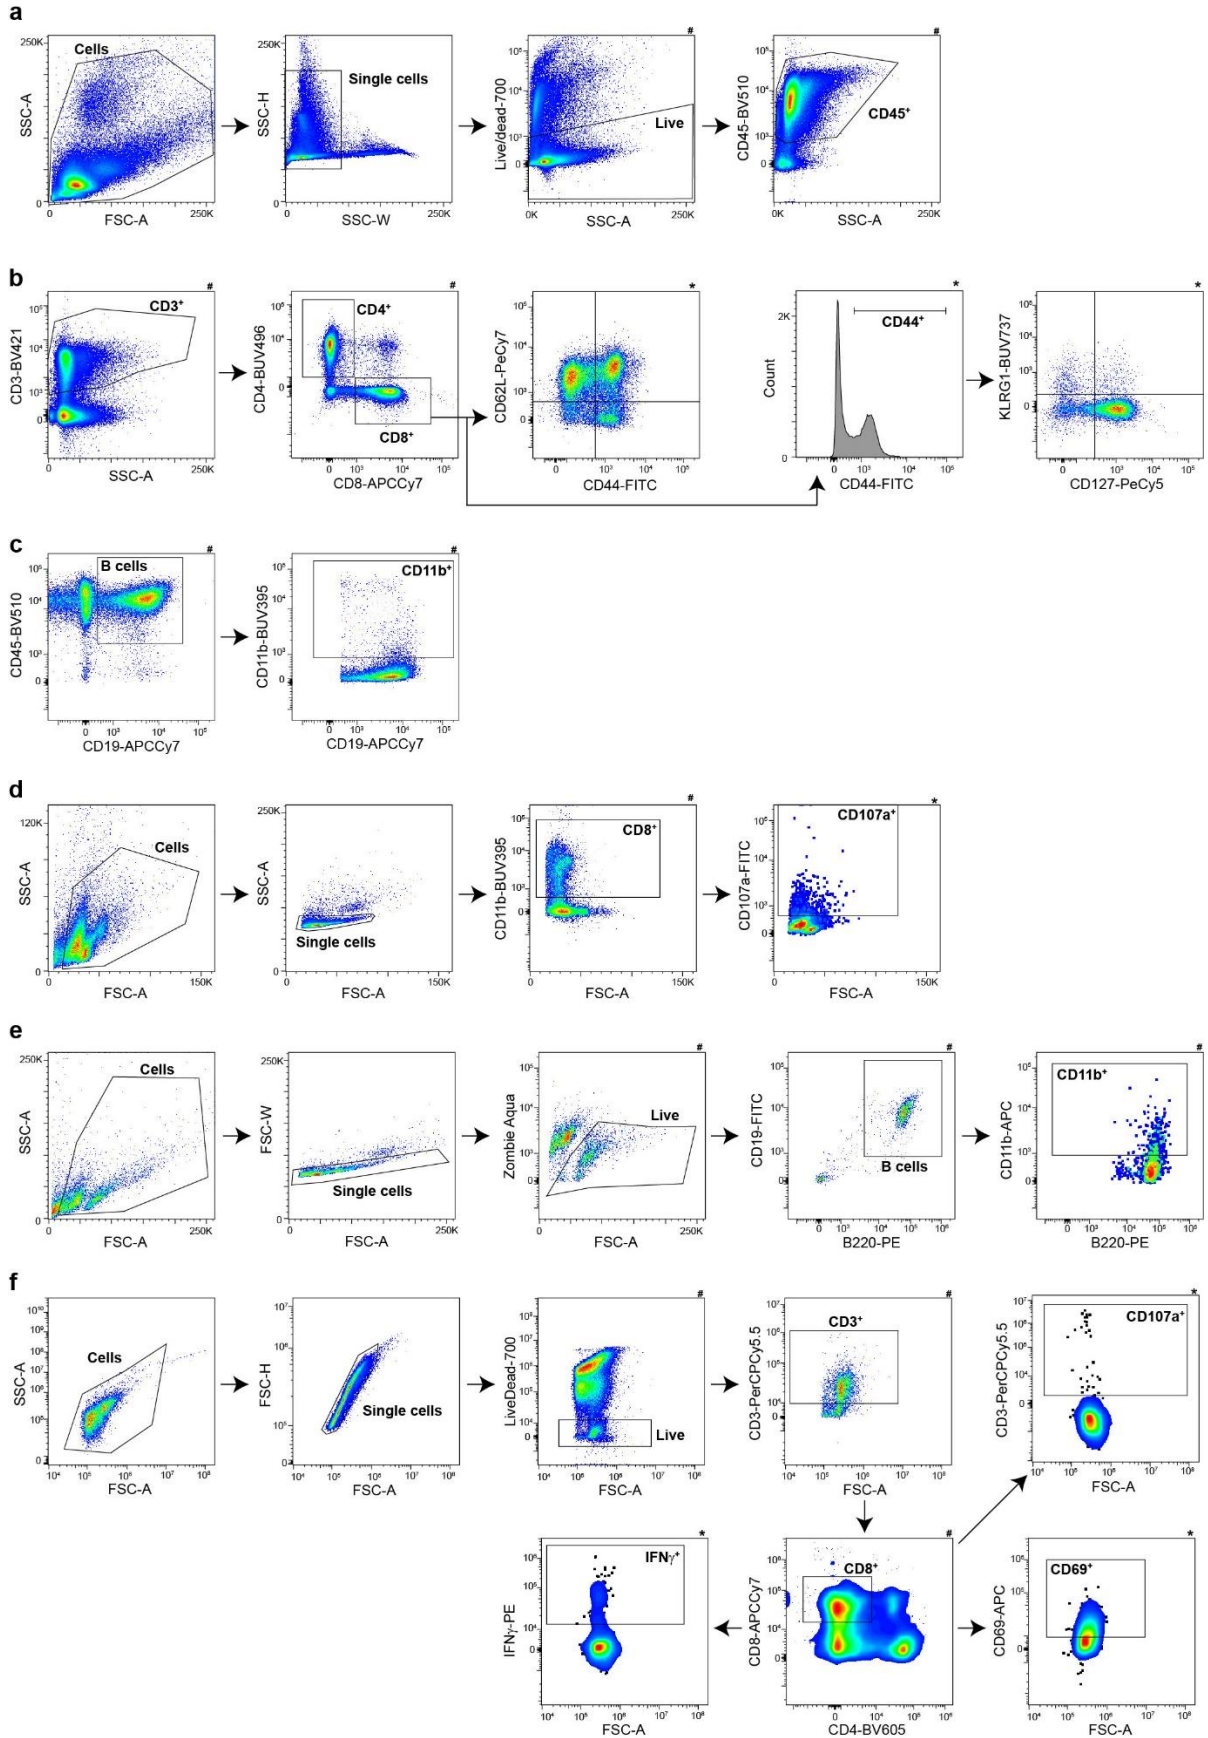

**Supplementary Fig. 13: Gating strategy used for flow cytometry analysis of splenocytes.**

**(a)** Gating strategy used to select live CD45<sup>+</sup> immune cells from single cell suspensions obtained from spleens in Supp. Fig. 5a-f, 10a. **(b)** Gating strategy used to identify CD62L<sup>+</sup>CD44<sup>-</sup> CD8 T cells, CD62L<sup>-</sup>CD44<sup>+</sup> CD8 T cells, CD127<sup>-</sup>KLRG1<sup>+</sup> CD8 T cells in Supp. Fig. 5a-f. **(c)** Gating strategy used to identify CD11b<sup>+</sup> B cells in Supp. Fig. 10a. **(d)** Gating strategy used to identify CD8<sup>+</sup> T cells and CD107a<sup>+</sup> CD8 T cells in Fig. 4o-r. **(e)** Gating strategy used to identify CD11b<sup>+</sup> B cells in Supp. Fig. 11b. **(f)** Gating strategy used to identify CD69<sup>+</sup> CD8 T cells, CD107a<sup>+</sup> CD8 T cells, IFN $\gamma$ <sup>+</sup> CD8 T cells in Supp. Fig. 11c-e. Asterisk indicates gates based on fluorescent minus one (FMO) controls. Hash indicates gates based on unstained controls.
