# Supplementary material for: Agonistic CD40 therapy induces tertiary lymphoid structures but impairs responses to checkpoint blockade in glioma
Source: PubMed Central journal article supplement (PMC8257767; doi:10.1038/s41467-021-24347-7), 2021-07-05
Supplement: 41467_2021_24347_MOESM2_ESM.pdf [file 41467_2021_24347_MOESM2_ESM.pdf]

Descriptions of Additional Supplementary Files

**Supplementary Movie 1**

**Description:** Z-stack of a tertiary lymphoid structure in the brain of a GL261 glioma-bearing mouse.

Green: CD45; Red: B220; Blue: Nuclei.
